# Supplementary material
Source: PubMed Central journal article supplement (PMC6045999)
Supplement: 13197_2018_3268_MOESM2_ESM.pdf [file 13197_2018_3268_MOESM2_ESM.pdf]

Bulb weight, diameter and total soluble solids (TSS) of onions.

|                        | Max | Min | Mean | CV   |
|------------------------|-----|-----|------|------|
| <b>Healthy onions</b>  |     |     |      |      |
| Weight, (g)            | 190 | 97  | 139  | 16.8 |
| Diameter, mm           | 76  | 56  | 67   | 7.1  |
| TSS, %                 | 7.5 | 7   | 7.1  | 2.1  |
| <b>Diseased onions</b> |     |     |      |      |
| Weight, (g)            | 191 | 101 | 150  | 18.7 |
| Diameter, mm           | 75  | 55  | 67   | 8.2  |
| TSS, %                 | 6   | 3.4 | 4.9  | 18.3 |

CV = Co-efficient of variation
