# Supplementary material
Source: PubMed Central journal article supplement (PMC6045999)

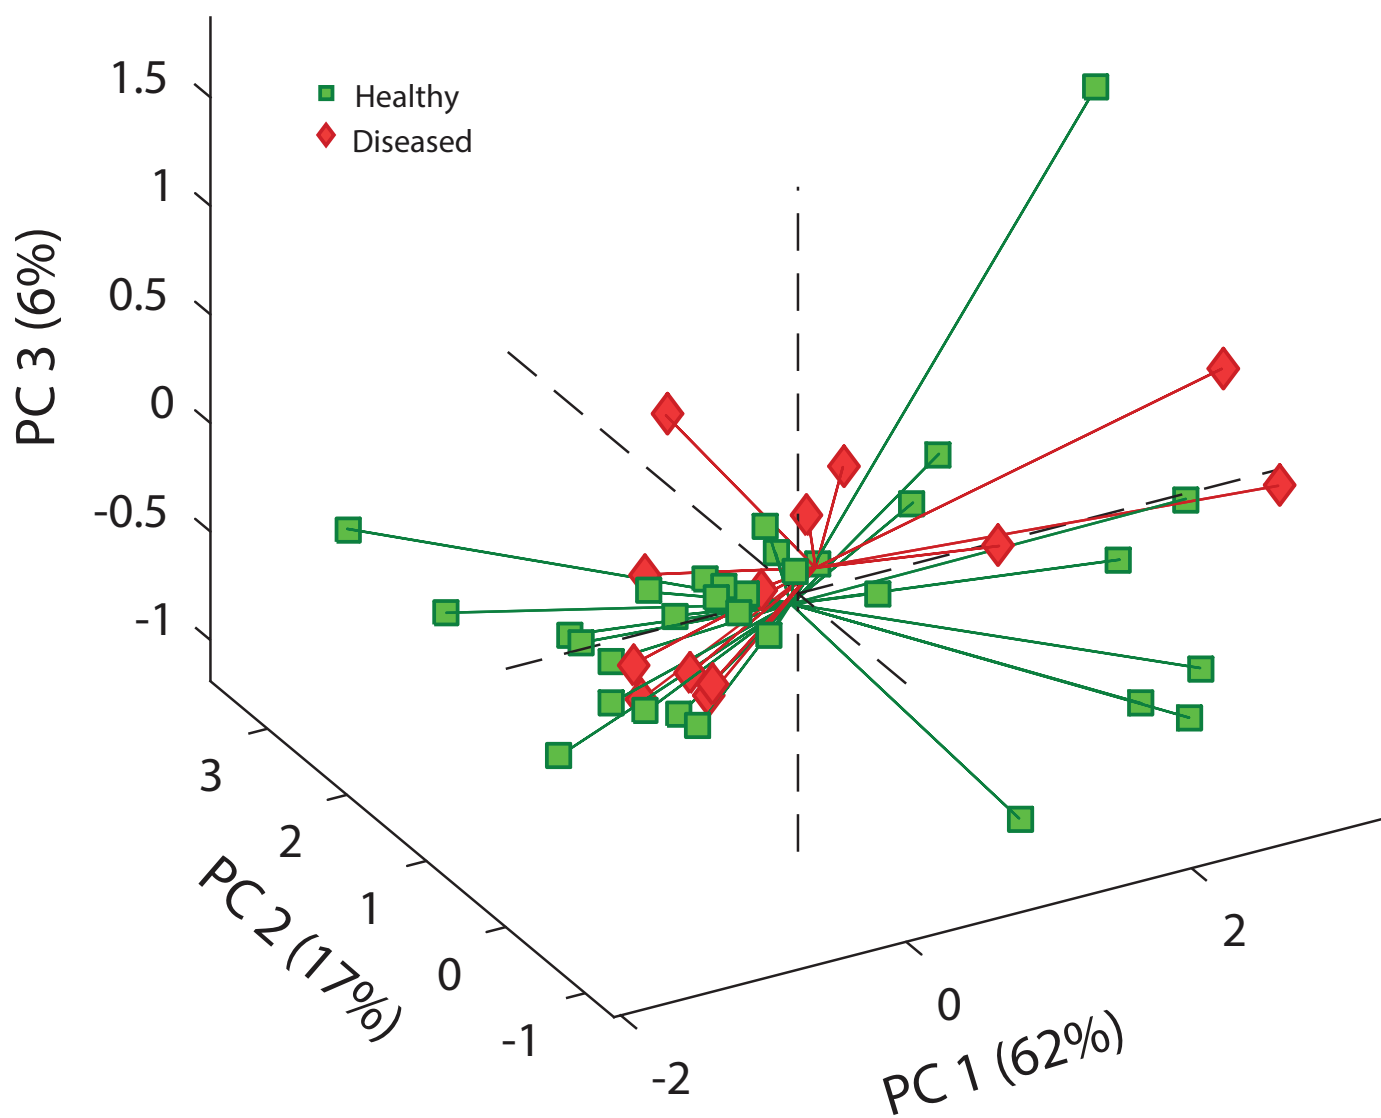

Principal component analysis of FT-NIR data. Score plot with three principal components.

Supplement: 13197_2018_3268_MOESM3_ESM.pdf [file 13197_2018_3268_MOESM3_ESM.pdf]
